# Supplementary material
Source: publisher figshare collection journal article supplement (https://tandf.figshare.com/ndownloader/files/12354902)
Supplement: Supplementary file 1 [file 12354902]

**Supplementary figure S1** Median  $\Delta$ MBDA score by treatment group

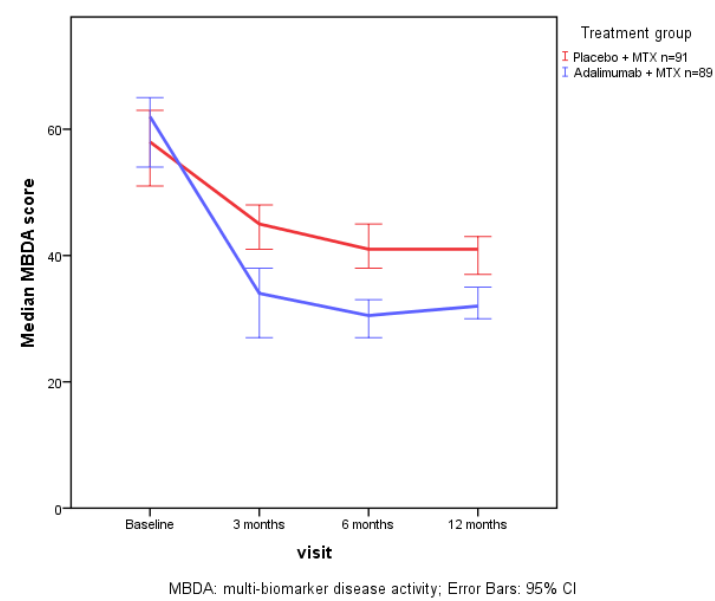

**Supplementary figure S2** Patients with a decrease in MBDA score from 0-3 months ( $\leq 20$  or  $>20$ ) and achievement of DAS28 remission at 6 months

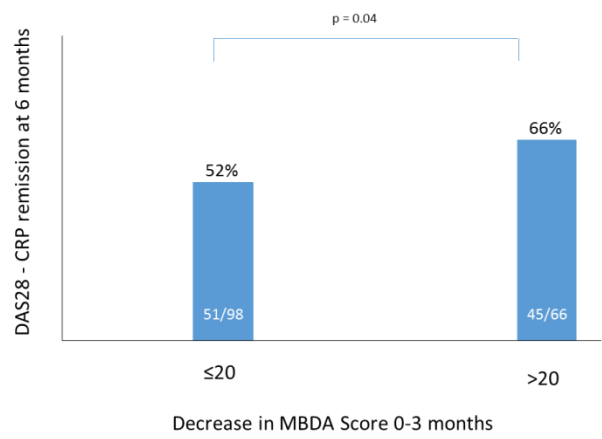

**Supplementary table S1** Spearman's correlations of baseline MBDA score and  $\Delta$ MBDA score versus changes in disease activity measures (CDAI, SDAI, CRP) after 6 and radiographic damage (JSN, ES) after 12 months

|                                | ΔCDAI                    |                          | ΔSDAI                    |                          | ΔCRP                     |                          | ΔJSN                    |                         | ΔES                     |                         |
|--------------------------------|--------------------------|--------------------------|--------------------------|--------------------------|--------------------------|--------------------------|-------------------------|-------------------------|-------------------------|-------------------------|
|                                | 0-6 months               |                          |                          |                          |                          |                          | 0-12 months             |                         |                         |                         |
|                                | MTX group                | MTX + adalimumab group   | MTX group                | MTX + adalimumab group   | MTX group                | MTX + adalimumab group   | MTX group               | MTX + adalimumab group  | MTX group               | MTX + adalimumab group  |
| MBDA score <sub>baseline</sub> | r = -0.403<br>(p<0.001)* | r = -0.266<br>(p=0.016)* | r = -0.470<br>(p<0.001)* | r = -0.398<br>(p<0.001)* | r = -0.762<br>(p<0.001)* | r = -0.761<br>(p<0.001)* | r = 0.237<br>(p=0.028)* | r = 0.060<br>(p=0.589)  | r = 0.225<br>(p=0.044)* | r = 0.077<br>(p=0.481)  |
| ΔMBDA score <sub>0-3 m</sub>   | r = 0.322<br>(p=0.003)*  | r = 0.258 (p=0.022)*     | r = 0.356<br>(p=0.001)*  | r = 0.309<br>(p=0.006)*  | r = 0.423<br>(p<0.001)*  | r = 0.354<br>(p=0.001)*  | r = 0.017<br>(p=0.881)  | r = 0.303<br>(p=0.007)* | r = -0.049<br>(p=0.674) | r = -0.004<br>(p=0.971) |

$\Delta$ : change; 0-3m: from baseline to 3 months; 0-6m: from baseline to 6 months; MBDA, multi-biomarker disease activity; CDAI, Clinical Disease Activity Index; SDAI, Simplified Disease Activity Index; CRP, serum C-reactive protein (mg/L) measured in a clinical laboratory; MBDA, multi-biomarker disease activity. Rho, Spearman correlation coefficient; p, p-value.  
 $\Delta$ TSS: total Sharp score;  $\Delta$ JSN: joint space narrowing;  $\Delta$ ES: erosion score; MBDA: multi-biomarker disease activity; r: Spearman correlation coefficient; p: p-values calculated by Mann-Whitney U test; \* p-value<0.05.
